# Supplementary material
Source: Springer Nature journal article supplement (https://www.springermedizin.de/resource/supplementary/12974_2008_167_MOESM4_ESM.pdf/9600916)

**RANTES**

**(fold to respective mock control)**

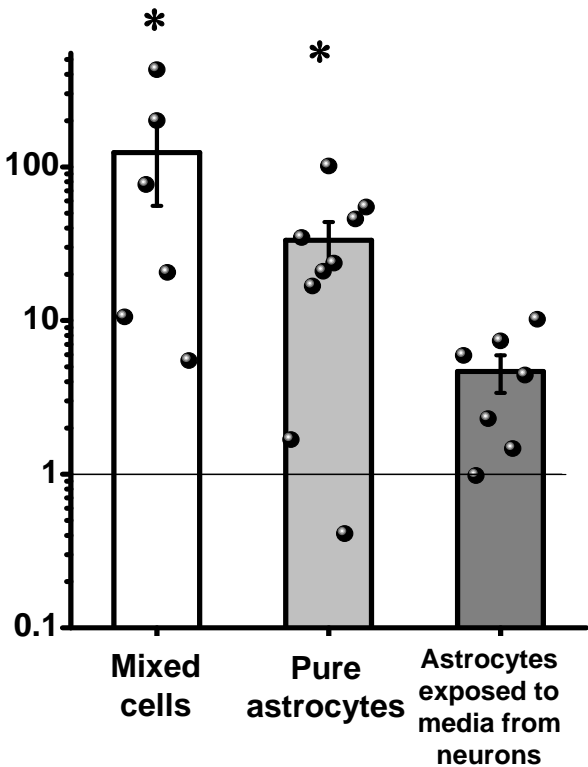

Supplement: MOESM4 [file 9600916]
